# Supplementary material
Source: HighWire-hosted journal article supplement (https://bjsm.bmj.com/content/52/9/566)

**Supplementary C:** Subgroup analysis of cam only FAIS cohorts and of studies with cohorts of a variety of morphologies “mixed FAIS” (cam, pincer and cam + pincer) compared with controls for hip kinematics and joint torques

**1.1 Peak Hip Flexion in Stance**

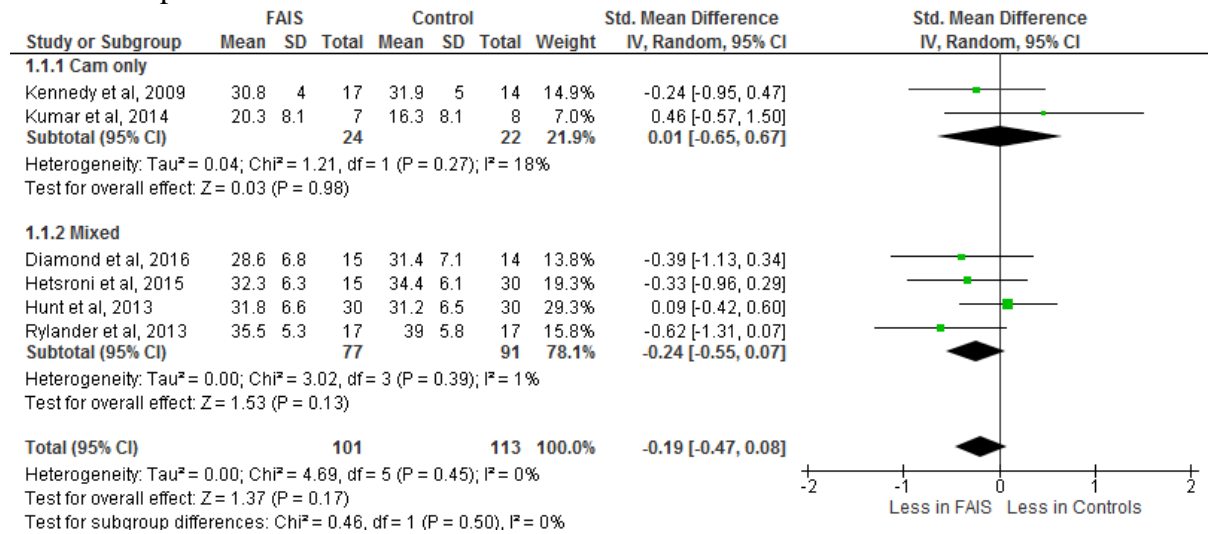

**1.2 Peak Hip Extension in Stance**

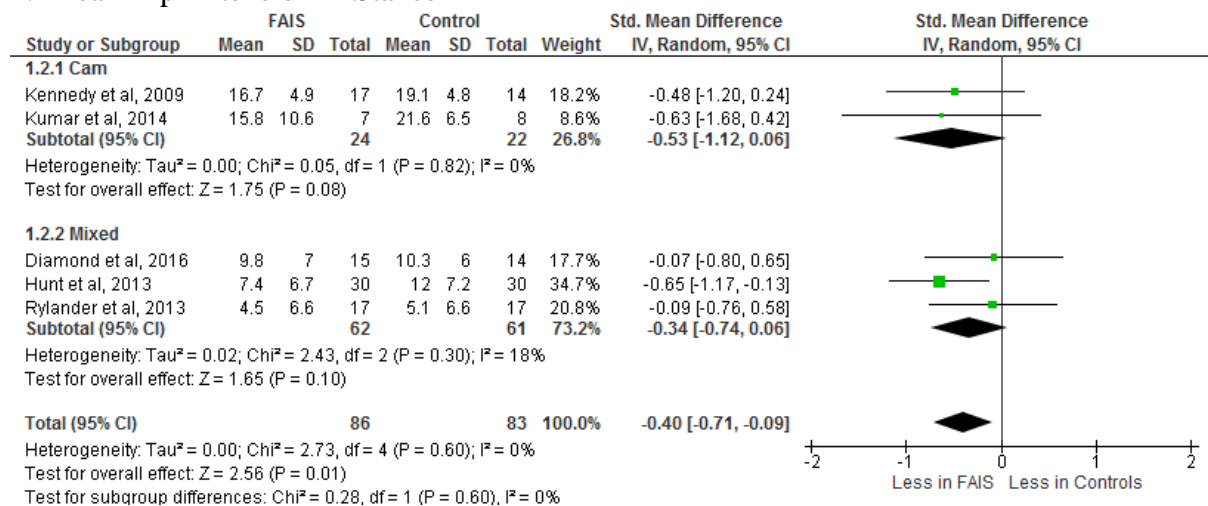

**1.3 Total Sagittal Plane ROM in Stance**

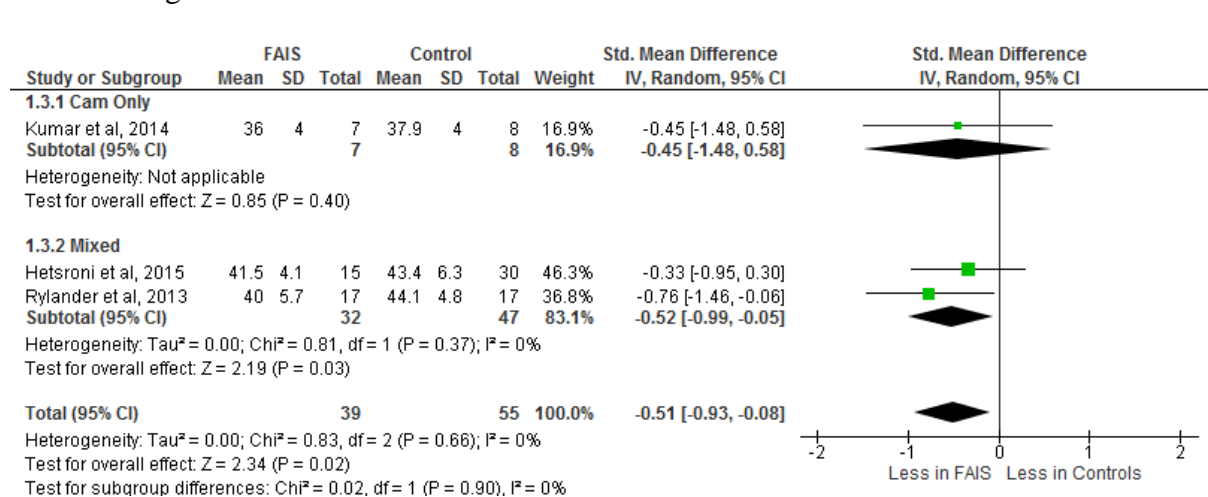

## 1.4 Total Sagittal Plane ROM in Cycle

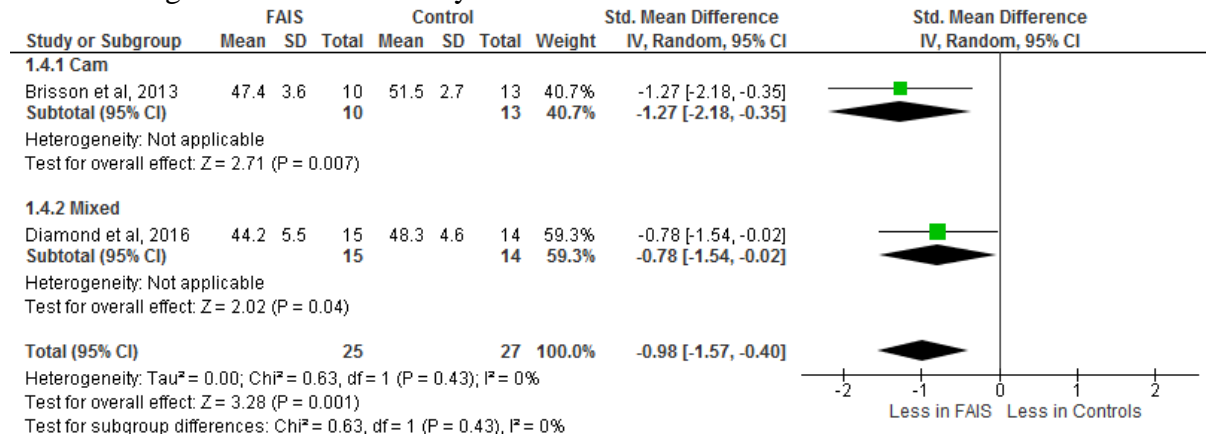

## 1.5 Peak Hip Adduction in Stance

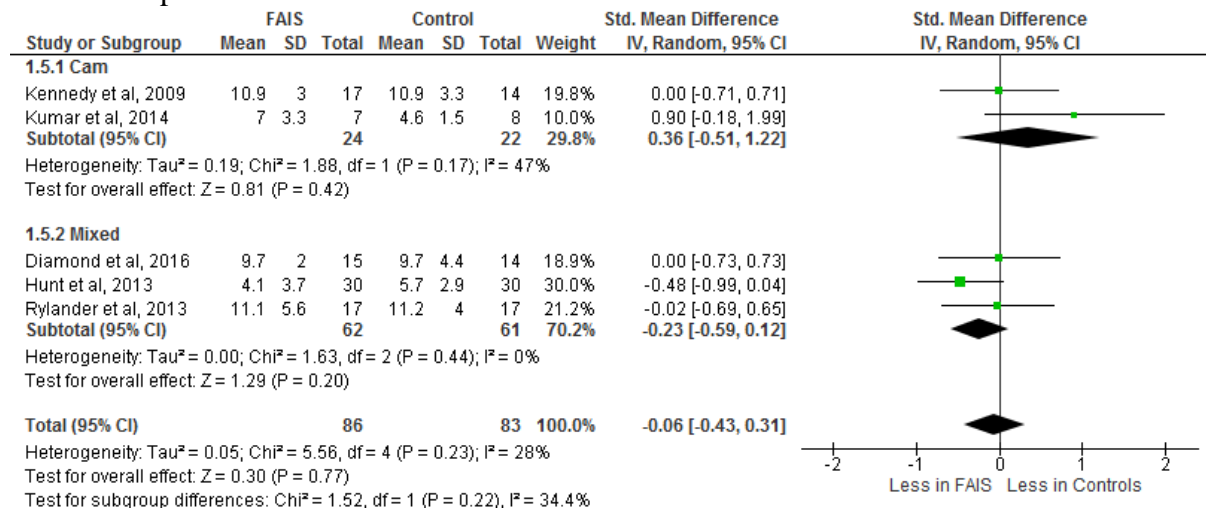

## 1.6 Peak Hip Abduction in Stance

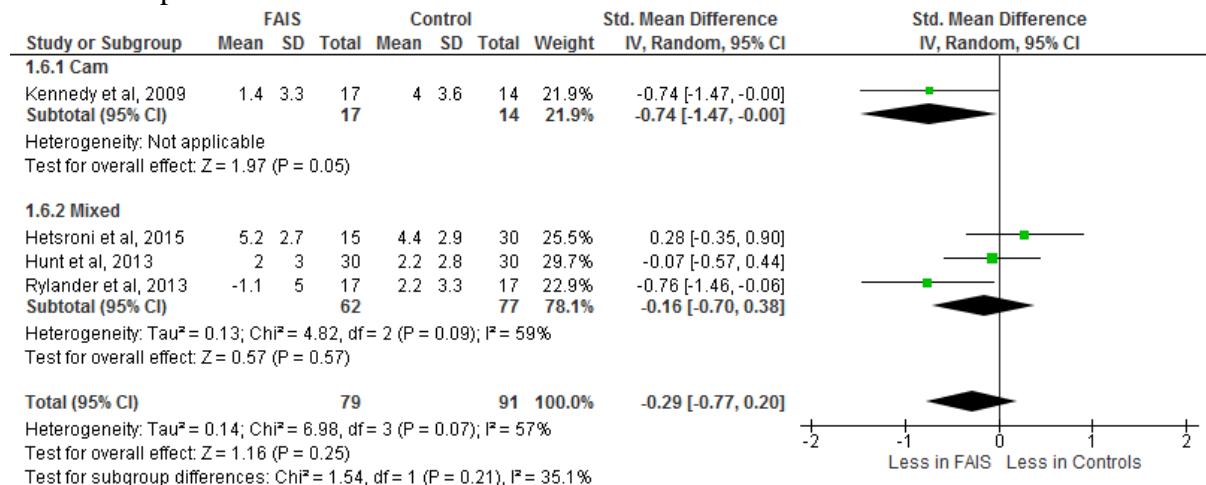

### 1.7 Total Frontal Plane ROM in stance

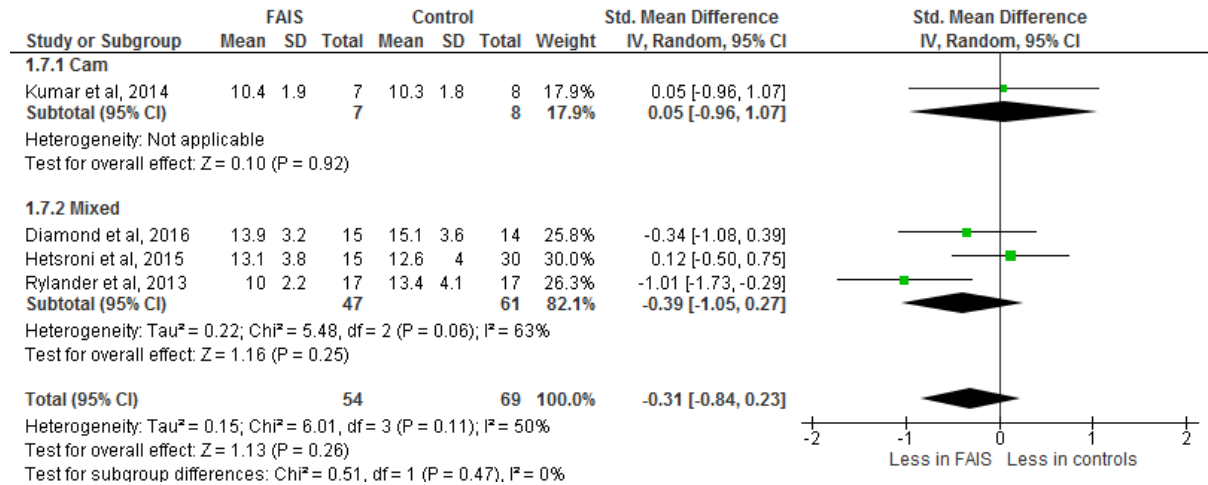

### 1.8 Total Frontal Plane ROM in Gait Cycle

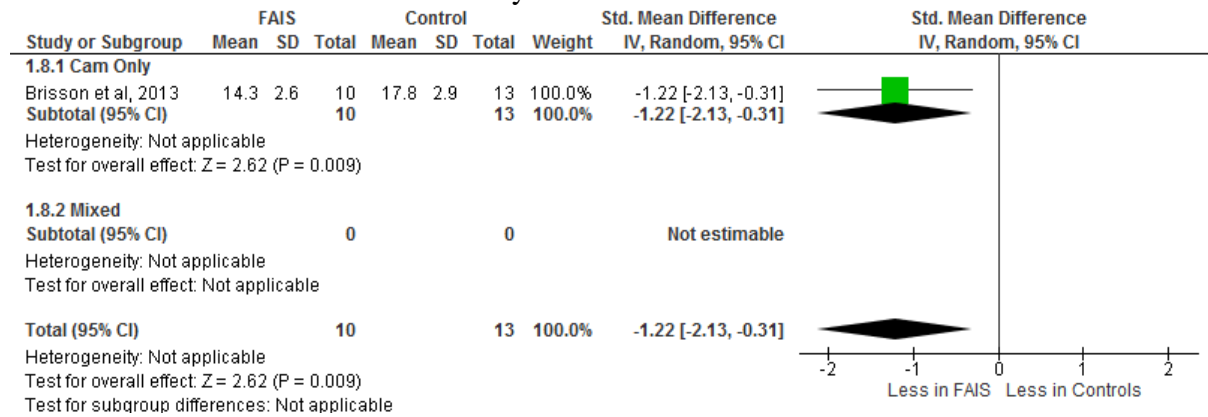

### 1.9 Peak Hip Internal Rotation in stance

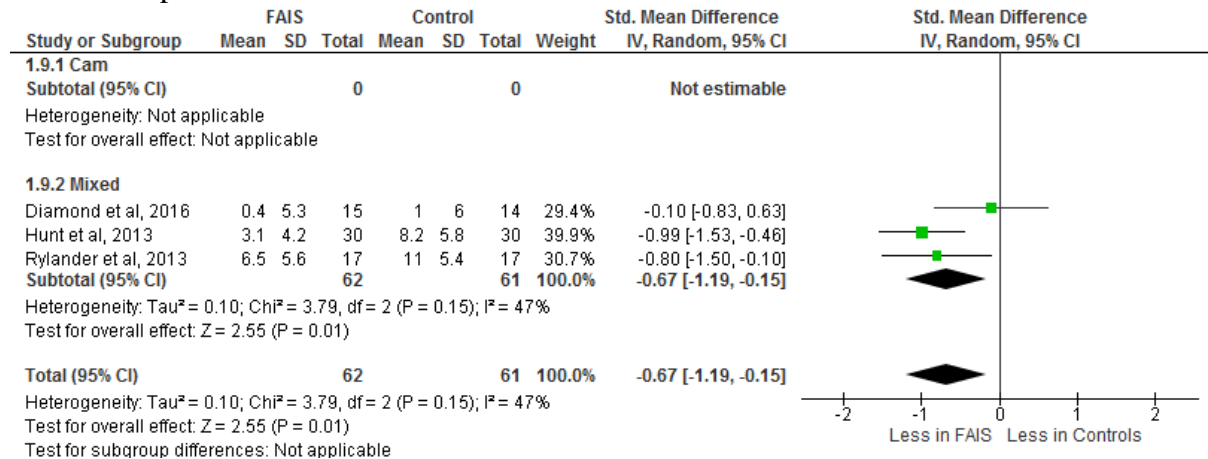

### 1.10 Peak Hip External Rotation in Stance

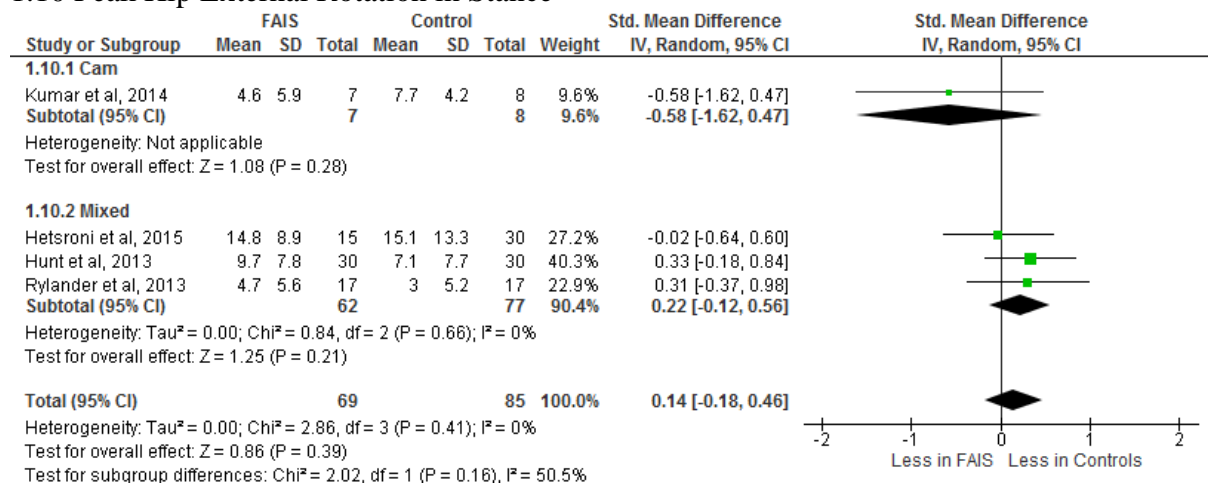

### 1.11 Total Transverse Plane ROM in Stance

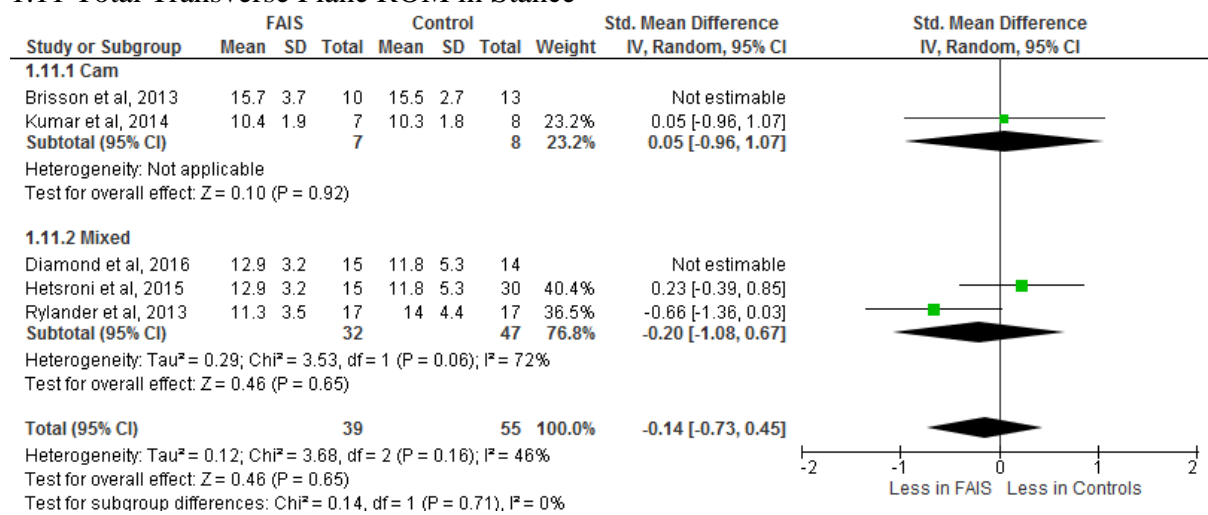

### 1.12 Total Transverse Plane ROM in Cycle

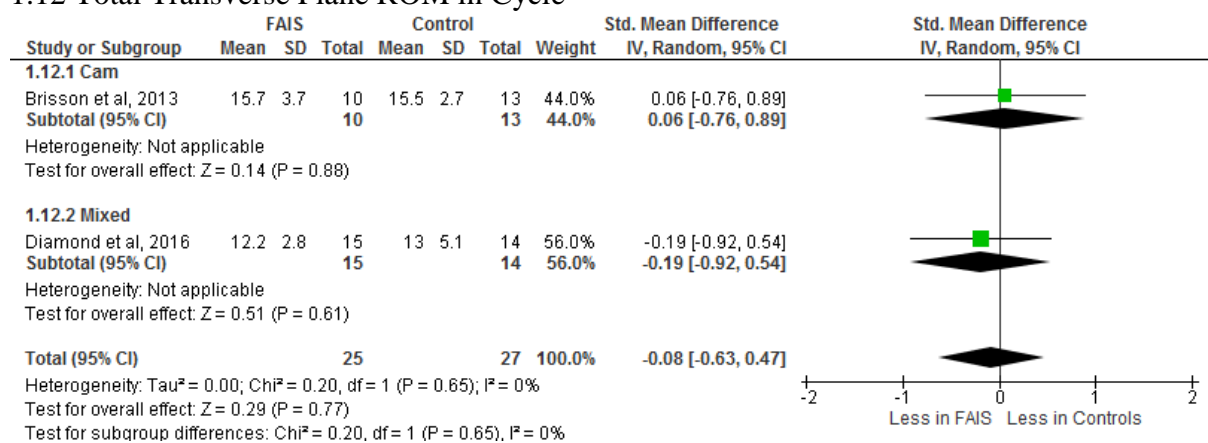

### 1.13 Peak Hip Flexion Torque in Stance

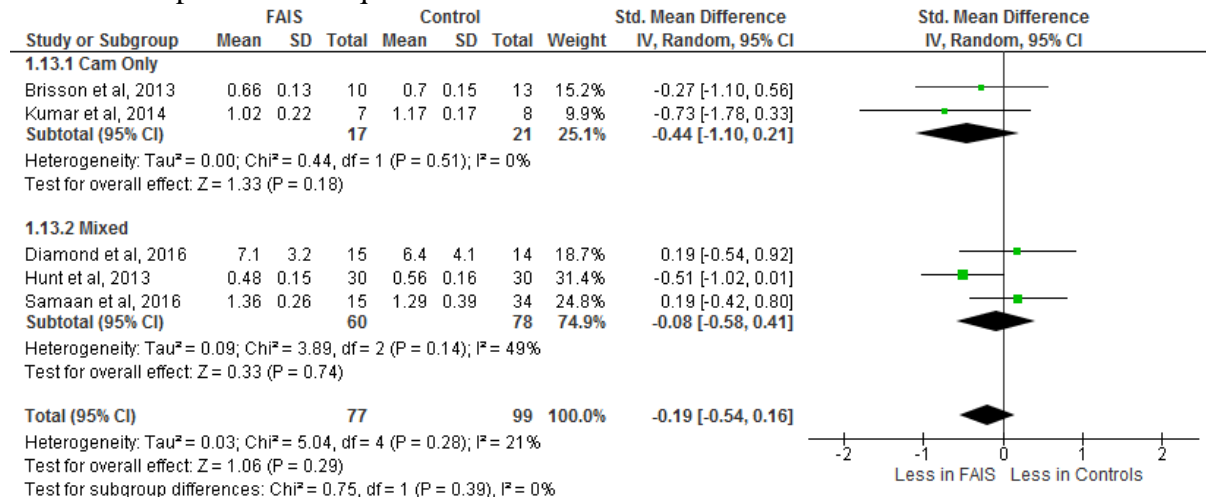

### 1.14 Peak Hip Extension Torque in Stance

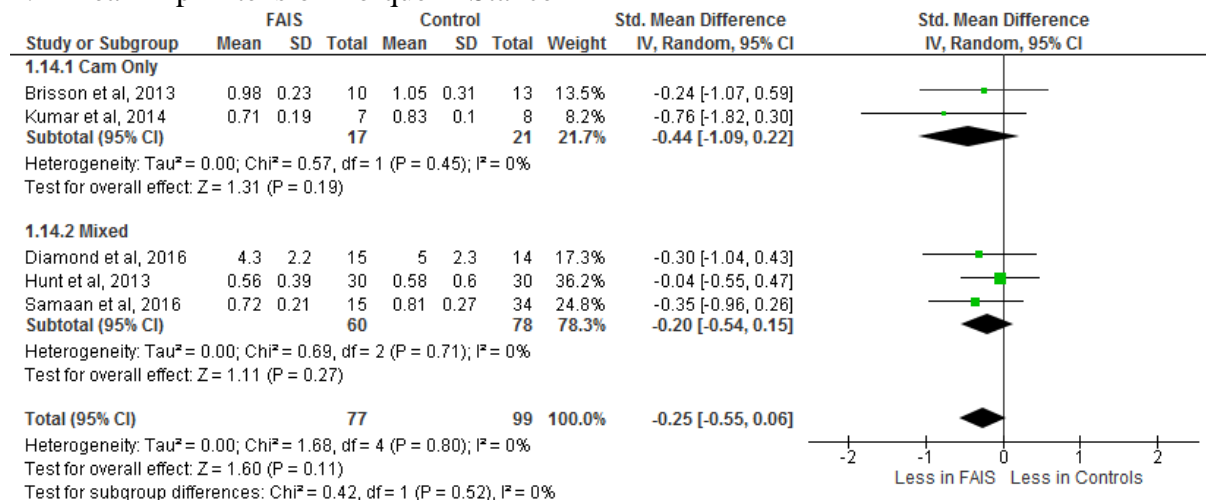

### 1.15 Peak Hip Adduction Torque in Stance

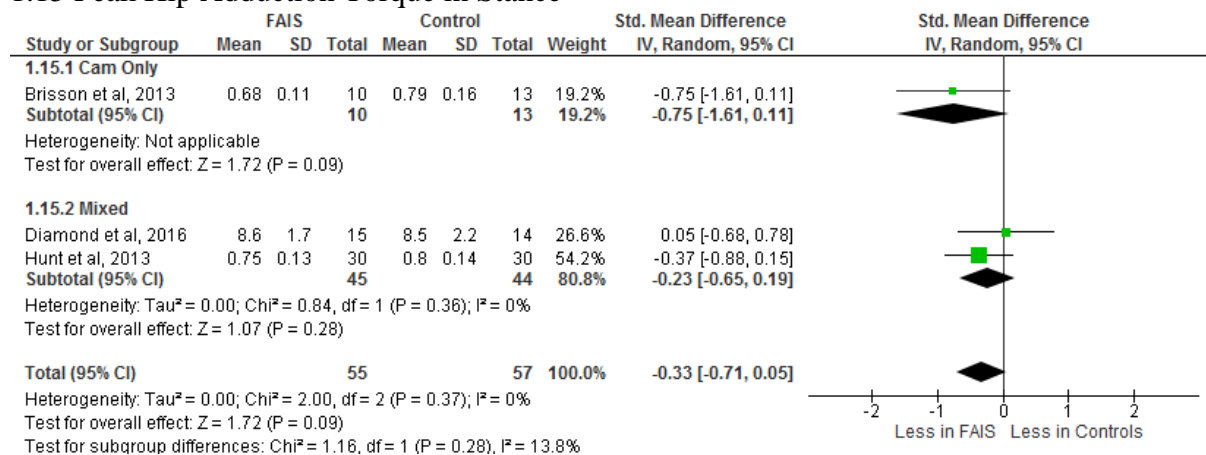

### 1.16 Peak Hip Abduction Torque in Stance

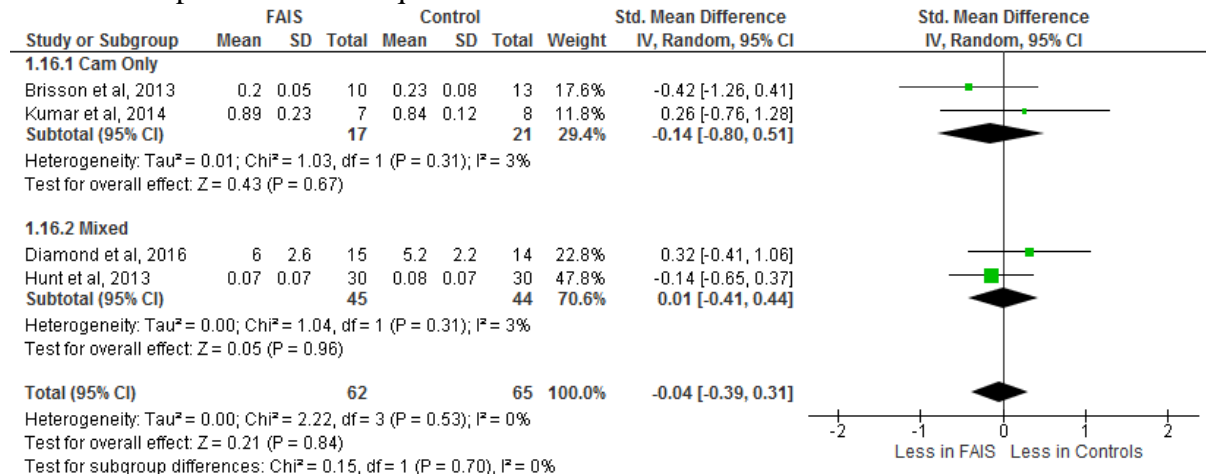

### 1.17 Peak Hip Internal Rotation Torque in Stance

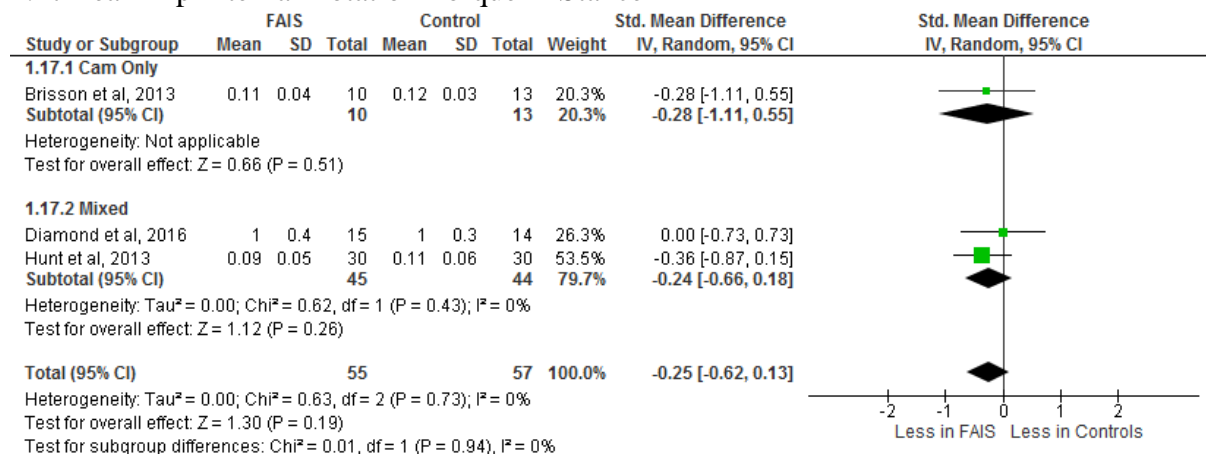

### 1.18 Peak Hip External Rotation Torque in Stance

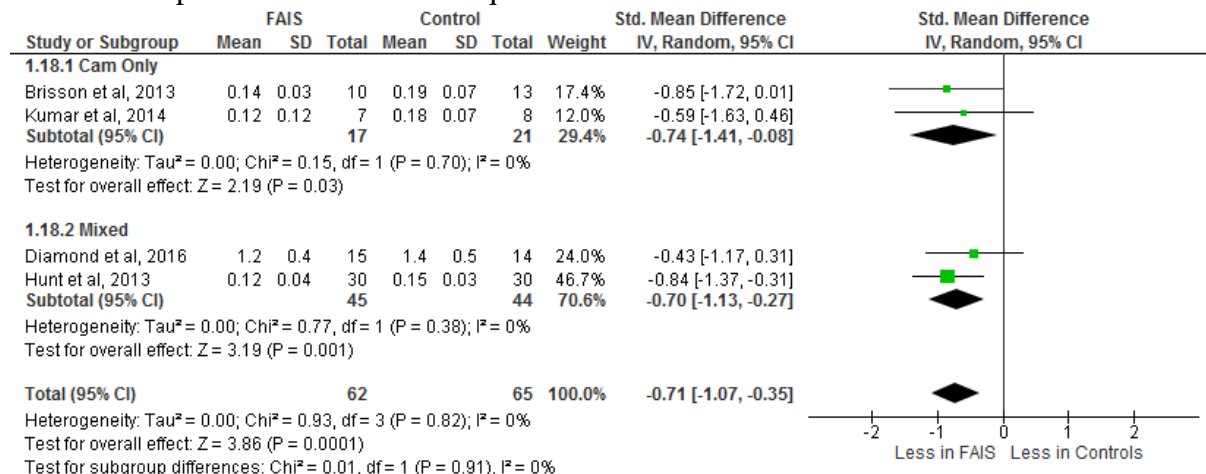

Supplement: inline-supplementary-material-3 [file inline-supplementary-material-3.pdf]
