# Supplementary material
Source: HighWire-hosted journal article supplement (https://bjsm.bmj.com/content/52/9/566)
Supplement: inline-supplementary-material-1 [file inline-supplementary-material-1.pdf]

## Supplementary A: Medline search strategy

### Medline: Ovid 1946-

|                                                    | Yield  |
|----------------------------------------------------|--------|
| 1. exp Femur Head/                                 | 8736   |
| 2. exp Acetabulum/                                 | 9833   |
| 3. exp Hip/                                        | 11050  |
| 4. exp Hip Joint/                                  | 24840  |
| 5. exp Femoracetabular Impingement/                | 982    |
| 6. "FAI".ab,ti.                                    | 1718   |
| 7. "femor?acetabular impingement".ab,ti.           | 1545   |
| 8. "CAM impingement".ab,ti.                        | 110    |
| 9. "pincer Impingement".ab,ti.                     | 71     |
| 10. "pistol grip deform*".ab,ti.                   | 37     |
| 11. "coxa profunda*".ab,ti.                        | 50     |
| 12. "protusio acetabuli".ab,ti.                    | 1      |
| 13. labral.ab,ti.                                  | 2300   |
| 14. Labr?m.ab,ti.                                  | 2255   |
| 15. impingement.ab,ti.                             | 7817   |
| 16. hip.ab,ti.                                     | 115487 |
| 17. fem?r.ab,ti.                                   | 41563  |
| 18. acetabul*.ab,ti.                               | 16750  |
| 19. 13 or 14 or 15                                 | 10657  |
| 20. 16 or 17 or 18                                 | 153032 |
| 21. 19 and 20                                      | 3357   |
| 1 or 2 or 3 or 4 or 5 or 6 or 7 or 8 or 9 or 10 or |        |
| 22. 11 or 12 or 21                                 | 49396  |
| 23. exp Gait/                                      | 22909  |
| 24. exp Biomechanical Phenomena/                   | 112385 |
| 25. exp Kinetics/                                  | 465939 |
| 26. "biomechanic*".ab,ti.                          | 52508  |
| 27. "kinematic*".ab,ti.                            | 27972  |
| 28. "kinetic*".ab,ti.                              | 328658 |

|     |                                                                   |         |
|-----|-------------------------------------------------------------------|---------|
| 29. | Torque.ab,ti.                                                     | 17194   |
| 30. | Force.ab,ti.                                                      | 204770  |
| 31. | gait.ab,ti.                                                       | 37945   |
| 32. | moment.ab,ti.                                                     | 44474   |
| 33. | "joint load".ab,ti.                                               | 257     |
| 34. | 23 or 24 or 25 or 26 or 27 or 28 or 29 or 30 or 31<br>or 32 or 33 | 1049550 |
| 35. | 22 and 34                                                         | 7507    |
