# Supplementary material
Source: HighWire-hosted journal article supplement (https://bjsm.bmj.com/content/52/9/566)

### Supplementary D: Sensitivity analysis, removal of graphed data

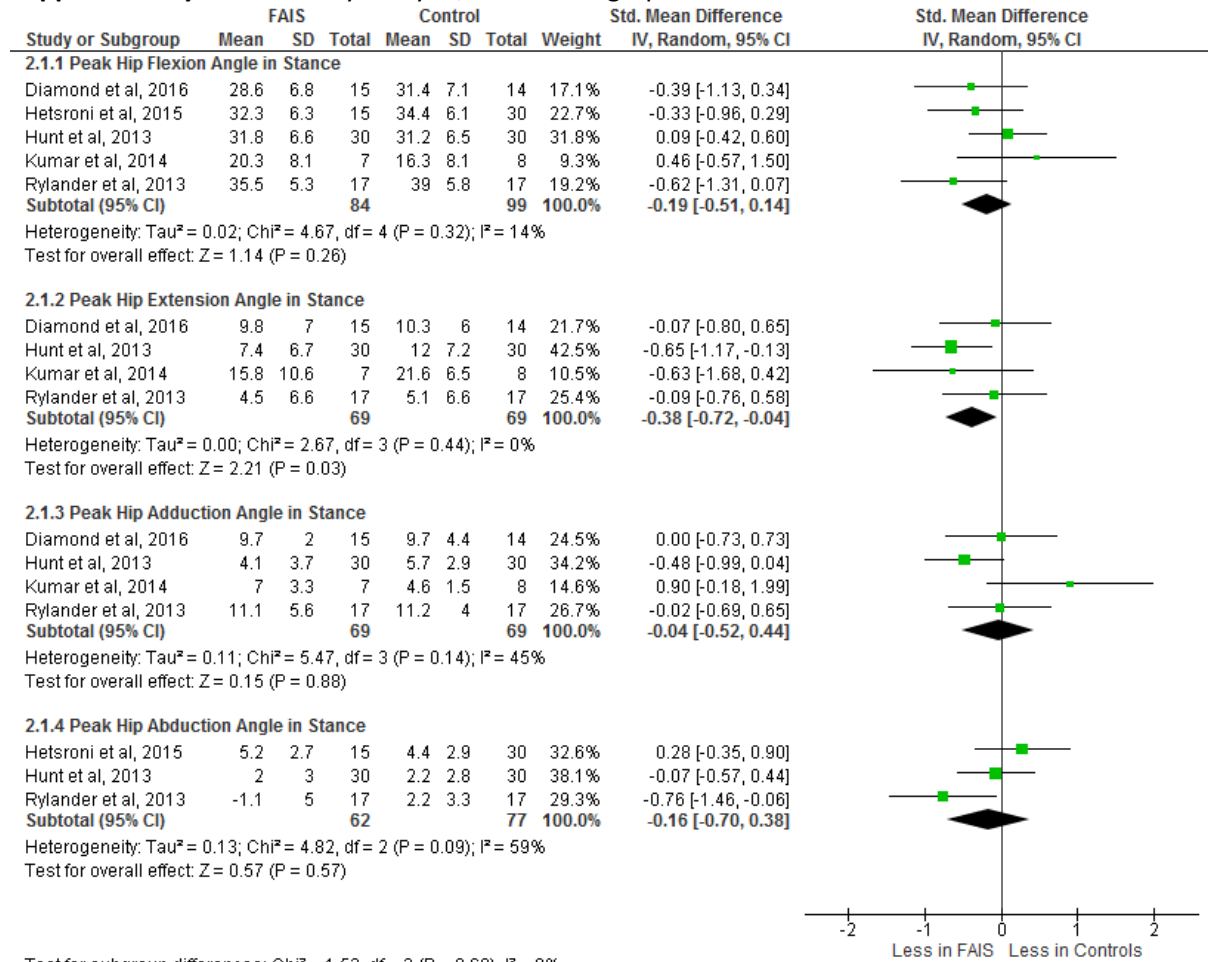

Supplement: inline-supplementary-material-4 [file inline-supplementary-material-4.pdf]
